# Supplementary material for: Monitoring Perinatal Gut Microbiota in Mouse Models by Mass Spectrometry Approaches: Parental Genetic Background and Breastfeeding Effects
Source: Front Microbiol. 2016 Sep 26;7:1523. doi: 10.3389/fmicb.2016.01523 (PMC5036385; doi:10.3389/fmicb.2016.01523)
Supplement: TABLE S2 — Summary of spectral analysis and FDR values. [file Table_2.XLSX]

## Sheet: Foglio1
	nr of queries	Mascot protein hits (bacteria)	Protein hits after filtering (bold red requirement and Mascot percolator)	FDR	PSM	unique peptide sequences		Mascot protein hits (mus musculus)	Protein hits after filtering (Mascot percolator)	FDR
Balb/c day3 rep 1	58649	2330	396	686 (5) 0,73%	2358	1006		765	455	1505 (14) 0,93%
Balb/c day3 rep 2	55403	2623	418	752 (5) 0,66%	2461	1024		840	470	1583 (10) 0,63%
Balb/c day3 rep 3	53544	2953	424	806 (8) 0,99%	2670	1091		958	401	1300 (4) 0,31%
Balb/c day7 rep 1	61946	3945	571	1113 (9) 0,81%	3923	1473		840	430	1792 (11) 0,61%
Balb/c day7 rep 2	60345	3891	524	1049 (3) 0,29%	3781	1404		940	456	1768 (10) 0,57%
Balb/c day7 rep 3	59361	3862	629	1246 (2) 0,16%	4220	1588		965	462	1791 (14) 0,78%
Balb/c day14 rep 1	65804	2520	310	311 (3) 0,96%	1984	777		910	378	1198 (2) 0,17%
Balb/c day14 rep 2	59573	2660	379	617 (2) 0,32%	2243	924		1018	453	1454 (3) 0,21%
Balb/c day14 rep 3	57823	2713	298	453 (2) 0,44	1923	761		900	521	1808 (13) 0,72%
Rag2 ko day3 rep 1	66081	3921	592	1422 (9) 0,63%	4195	1599		1405	976	5101 (22) 0,43%
Rag2 ko day3 rep 2	64809	3866	599	1427 (6) 0,42%	4168	1573		1528	1081	5274 (20) 0,38%
Rag2 ko day3 rep 3	63775	3910	621	1411 (13) 0,92%	4213	1598		1501	1017	4987 (28) 0,56%
Rag2 ko day7 rep 1	59310	6167	890	3296 (5) 0,15%	10765	3633		750	270	842 (4) 0,48%
Rag2 ko day7 rep 2	58801	6411	864	3077 (5) 0,16%	10533	3552		762	276	821 (6) 0,73%
Rag2 ko day7 rep 3	58128	5633	931	3040 (23) 0,76%	8736	3397		731	186	435 (2) 0,46%
Rag2 ko day14 rep 1	51386	4335	642	2477 (3) 0,12%	8904	2689		495	89	241 (1) 0,41%
Rag2 ko day14 rep 2	49525	4263	771	3698 (37) 1,0%	9495	3075		504	33	66 (0) 0,0%
Rag2 ko day14 rep 3	49775	4179	713	3307 (23) 0,70%	9208	2885		502	36	87 (0) 0,0%
Balb fed by Rag day3 rep 1	51962	1944	150	197 (0) 0%	825	325		1074	460	1506 (4) 0,27%
Balb fed by Rag day3 rep 2	47190	2137	164	255 (1) 10,39%	930	357		1116	599	2142 (11) 0,51%
Balb fed by Rag day3 rep 3	50184	1714	160	201 (2) 1,0%	866	351		1117	622	2084 (16) 0,77%
Balb fed by Rag day7 rep 1	61119	3764	222	224 (0)	3016	1197		666	163	391 (1) 0,26%
Balb fed by Rag day7 rep 2	52463	3739	569	1089 (9) 0,83%	3338	1332		701	172	420 (1) 0,24%
Balb fed by Rag day7 rep 3	72817	1492	153	164 (1) 0%	826	329		310	43	71 (0) 0%
Rag fed by Balb day3 rep 1	51314	2334	166	17	1381	460		713	260	719 (3) 0.42%
Rag fed by Balb day3 rep 2	50400	2075	188	213 (0) 0%	996	367		704	194	504 (2) 0,40%
Rag fed by Balb day3 rep 3	49646	2360	238	309 (1) 0,32%	1287	464		719	241	702 (2) 0,28%
Rag fed by Balb day7 rep 1	51969	3028	385	631 (2) 0,32%	2250	951		588	76	173 (0) 0.00%
Rag fed by Balb day7 rep 2	48996	2662	335	564 (1) 0,18%	2053	836		607	132	301 (1) 0,33%
Rag fed by Balb day7 rep 3	46314	2778	190	208 (0) 0%	1482	567		624
